# Supplementary material
Source: PubMed Central journal article supplement (PMC4672942)
Supplement: NIHMS650680-supplement.pdf [file NIHMS650680-supplement.pdf]

Supplementary Table 1. Primary MTV by **T** Stage

|                           | T2<br>(n=28)          | T3<br>(n=23)           | T4<br>(n=17)           |
|---------------------------|-----------------------|------------------------|------------------------|
| Primary MTV               |                       |                        |                        |
| Mean (standard deviation) | 6.39 (3.20)           | 13.24 (8.06)           | 26.79 (16.64)          |
| Median (range)            | 5.67 (2.22-<br>15.26) | 11.62 (2.99-<br>35.22) | 19.78 (7.33-<br>64.45) |
| Lowest third              | 19 ( 67.9%)           | 4 ( 17.4%)             | 0 ( 0.0%)              |
| Middle third              | 8 ( 28.6%)            | 11 ( 47.8%)            | 4 ( 23.5%)             |
| Highest third             | 1 ( 3.6%)             | 8 ( 34.8%)             | 13 ( 76.5%)            |

Analysis of variance (ANOVA): R-squared = 0.42; p <0.001

Supplementary Table 2. Correlation of Baseline Primary MTV with Treatment

Outcomes—Subgroup Analysis for p16-Positive Oropharynx Cases

| Variable                                                   | Endpoint                  | Hazard ratio<br>(95% CI) | p-value |
|------------------------------------------------------------|---------------------------|--------------------------|---------|
| Complete cases (n=25)-----                                 |                           |                          |         |
| Primary MTV (continuous)                                   | Local relapse             | 1.09 (1.02, 1.16)        | 0.01    |
|                                                            | Local-regional relapse    | 1.04 (1.00, 1.09)        | 0.04    |
|                                                            | Distant metastasis        | 1.04 (0.98, 1.11)        | 0.16    |
|                                                            | Progression-free survival | 1.05 (1.01, 1.09)        | 0.01    |
|                                                            | Overall survival          | 1.03 (0.99, 1.08)        | 0.14    |
| Primary MTV (> vs. ≤ median)                               | Local relapse             | Cannot estimate [1]      |         |
|                                                            | Local-regional relapse    | 4.34 (0.52, 36.08)       | 0.17    |
|                                                            | Distant metastasis        | Cannot estimate [1]      |         |
|                                                            | Progression-free survival | 2.36 (0.61, 9.20)        | 0.21    |
|                                                            | Overall survival          | 1.42 (0.23, 8.97)        | 0.71    |
| With imputed p16 status (median n=41, range 37 to 44)----- |                           |                          |         |
| Primary MTV (continuous)                                   | Local relapse             | 1.08 (1.02, 1.14)        | <.01    |
|                                                            | Local-regional relapse    | 1.05 (1.01, 1.08)        | 0.01    |
|                                                            | Distant metastasis        | 1.05 (0.99, 1.11)        | 0.09    |
|                                                            | Progression-free survival | 1.05 (1.01, 1.08)        | <.01    |
|                                                            | Overall survival          | 1.03 (0.99, 1.08)        | 0.12    |
| Primary MTV (> vs. ≤ median)                               | Local relapse             | Cannot estimate [1]      |         |
|                                                            | Local-regional relapse    | 7.90 (0.98, 64.06)       | 0.05    |
|                                                            | Distant metastasis        | Cannot estimate [1]      |         |
|                                                            | Progression-free survival | 2.74 (0.83, 9.03)        | 0.10    |
|                                                            | Overall survival          | 1.42 (0.31, 6.52)        | 0.65    |

CI = confidence interval.

Hazard ratios estimated from Cox models.

[1] Greater than median group has 0 events.
